# Supplementary material for: Transcatheter Closure of Patent Ductus Arteriosus under Echocardiography Guidance: A Randomized Controlled Noninferiority Trial
Source: J Interv Cardiol. 2020 Oct 3;2020:4357017. doi: 10.1155/2020/4357017 (PMC7556051; doi:10.1155/2020/4357017)
Supplement: Supplementary Materials — Supplemental video: transcatheter closure of a PDA under TTE guidance via the femoral vein. [file 4357017.f1.zip]

Archive with 2 entries (2 files):
- 4357017.f1/mat.4357017.v1.mov
- 4357017.f1/mat.4357017.v2.mov
